# Supplementary material
Source: PubMed Central journal article supplement (PMC6052259)
Supplement: AEM.00598-18_zam015188639s1.pdf [file AEM.00598-18_zam015188639s1.pdf]

## Supplemental Material

**Table S1.** Soil chemistry of the litter layer versus the O horizon.

|                         | <b>Litter Layer</b> | <b>O Horizon</b> |
|-------------------------|---------------------|------------------|
| <b>pH</b>               | 4.3                 | 4.9              |
| <b>%OM</b>              | 27.4                | 25.8             |
| <b>Total C</b>          | 0.7932              | 0.6292           |
| <b>Total N</b>          | 26.02               | 19.60            |
| <b>C:N ratio</b>        | 32.80               | 31.15            |
| <b>NO<sub>3</sub>-N</b> | 2.2                 | 3.7              |
| <b>P</b>                | 61.3                | 57.3             |
| <b>Type</b>             | loam                | loam             |

**Table S2.** Average number of reads assigned to nitrogen cycle pathway genes for each set of samples (n=4). The number of N cycle pathway reads were lower in the metatranscriptome (MT) than metagenome (MG) samples, and lower in the litter layer (LL) than the O-horizon (OH) samples.

| Nitrogen Pathway                | Gene | OH Initial | MT | OH +H2O | MT | OH +H2O +N | MT | LL Initial | MT | LL Control | MT | LL +H2O | MT | LL +H2O +N | MT | LL +H2O | MG | LL +H2O +N | MG |
|---------------------------------|------|------------|----|---------|----|------------|----|------------|----|------------|----|---------|----|------------|----|---------|----|------------|----|
| Nitrification                   | hao  | 1.25       |    | 1.5     |    | 0.5        |    | 0          |    | 0          |    | 0       |    | 0.25       |    | 1.5     |    | 2.25       |    |
| Denitrification                 | nosZ | 3.25       |    | 0.75    |    | 2.25       |    | 1          |    | 0          |    | 0       |    | 0          |    | 3.25    |    | 5          |    |
| Denitrification                 | norB | 9.5        |    | 3.25    |    | 6.75       |    | 0.5        |    | 0.5        |    | 0       |    | 0          |    | 51.5    |    | 61.25      |    |
| Denitrification                 | norC | 0          |    | 0       |    | 0          |    | 0          |    | 0          |    | 0       |    | 0          |    | 1       |    | 2          |    |
| Denitrification                 | nirK | 0          |    | 0       |    | 0          |    | 0          |    | 0          |    | 0       |    | 0          |    | 0       |    | 0          |    |
| Dissimilatory nitrate reduction | nirB | 26.5       |    | 9.75    |    | 18.75      |    | 9.5        |    | 1          |    | 2.25    |    | 0.5        |    | 1452.75 |    | 1191.75    |    |
| Dissimilatory nitrate reduction | nirD | 8.5        |    | 6.5     |    | 7          |    | 1          |    | 1          |    | 0.75    |    | 1.25       |    | 92.5    |    | 84         |    |
| Assimilatory nitrate reduction  | nirA | 142.5      |    | 51      |    | 110.25     |    | 29.5       |    | 6.5        |    | 7.5     |    | 7          |    | 1554.75 |    | 1436.75    |    |
| Assimilatory nitrate reduction  | napB | 0.75       |    | 0.5     |    | 0          |    | 1.75       |    | 0          |    | 0       |    | 0          |    | 12.5    |    | 11.75      |    |
| Nitrogen Fixation               | nifH | 3          |    | 0       |    | 0.5        |    | 0.75       |    | 1.5        |    | 0       |    | 0          |    | 1.75    |    | 1          |    |

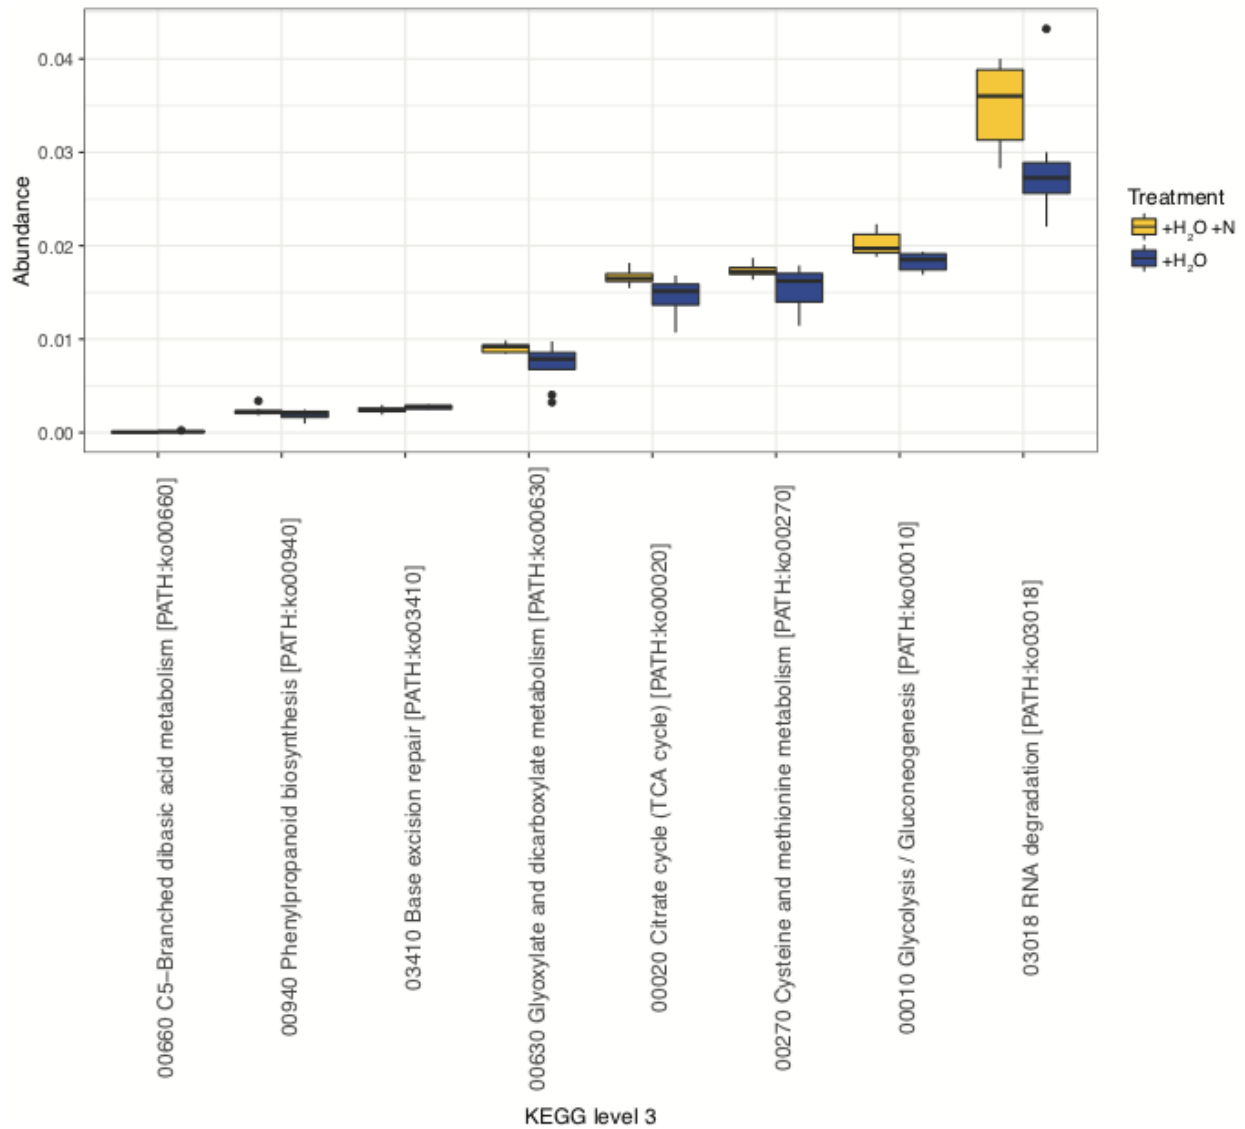

**Figure S1.** Carbohydrate metabolism pathways (KEGG annotations) with significantly different expression in the + H<sub>2</sub>O treatment (blue) compared to the +H<sub>2</sub>O +N treatment (orange) at the final sampling time (64 hours).

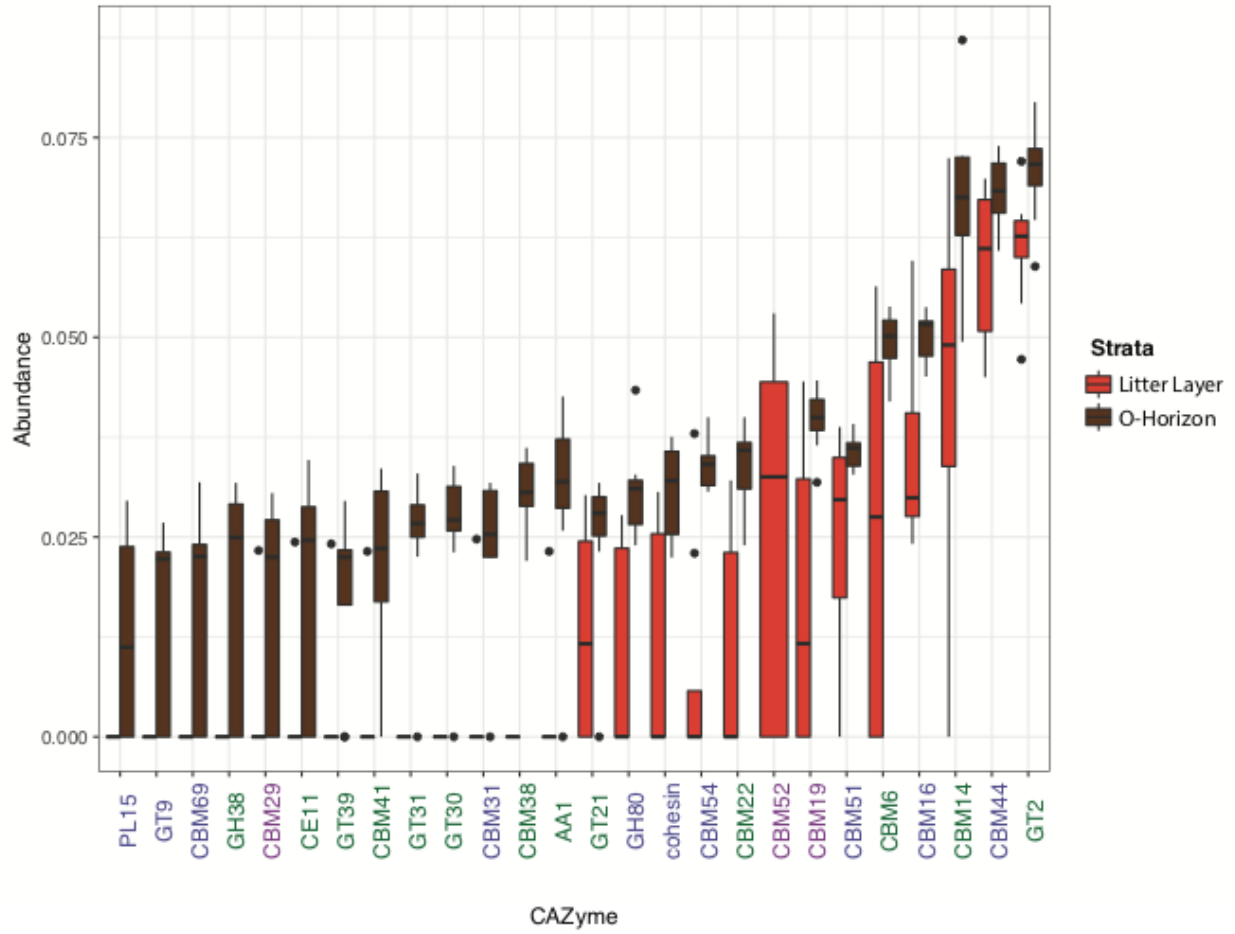

**Figure S2.** CAZymes with significantly different expression in the litter layer (red) compared to the O-horizon (brown) at the final sampling time (64 hours). CAZymes associated with bacteria/archaea (blue), fungi (purple) or both bacteria/archaea and fungi (green).

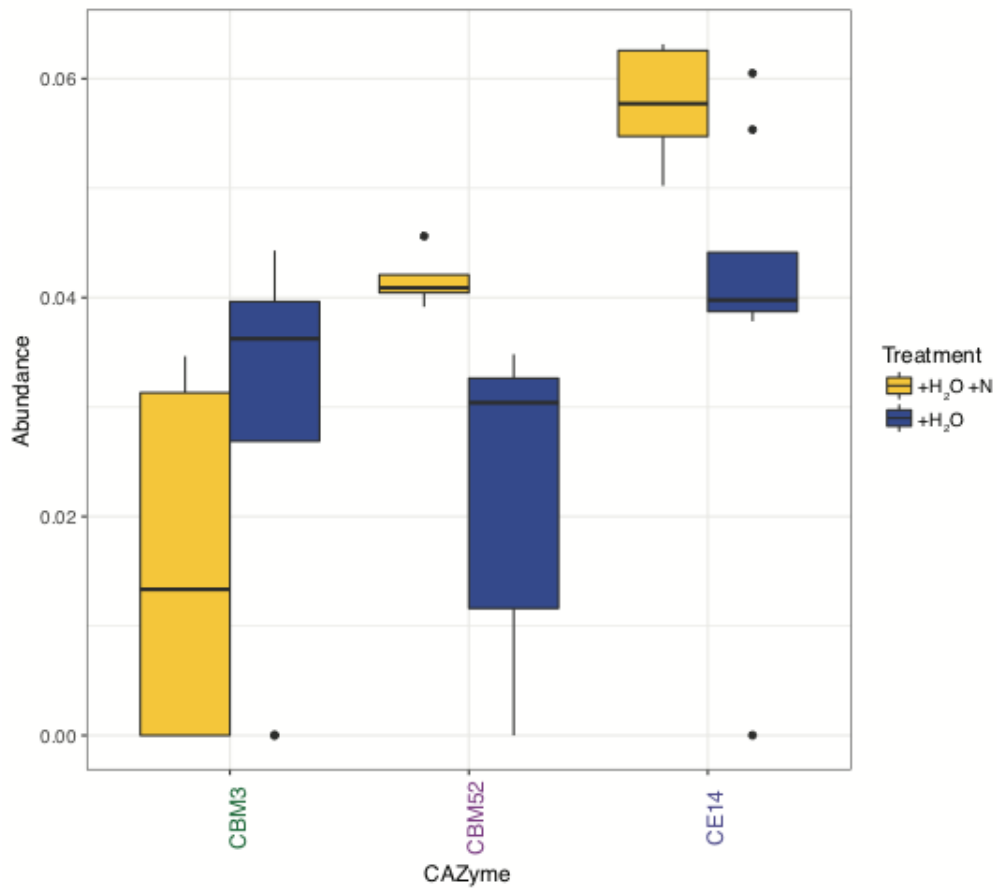

**Figure S3.** CAZymes with significantly different expression in the + H<sub>2</sub>O treatment (blue) compared to the +H<sub>2</sub>O +N treatment (orange) at the final sampling time (64 hours). CAZymes associated with bacteria/archaea (blue), fungi (purple) or both bacteria/archaea and fungi (green).

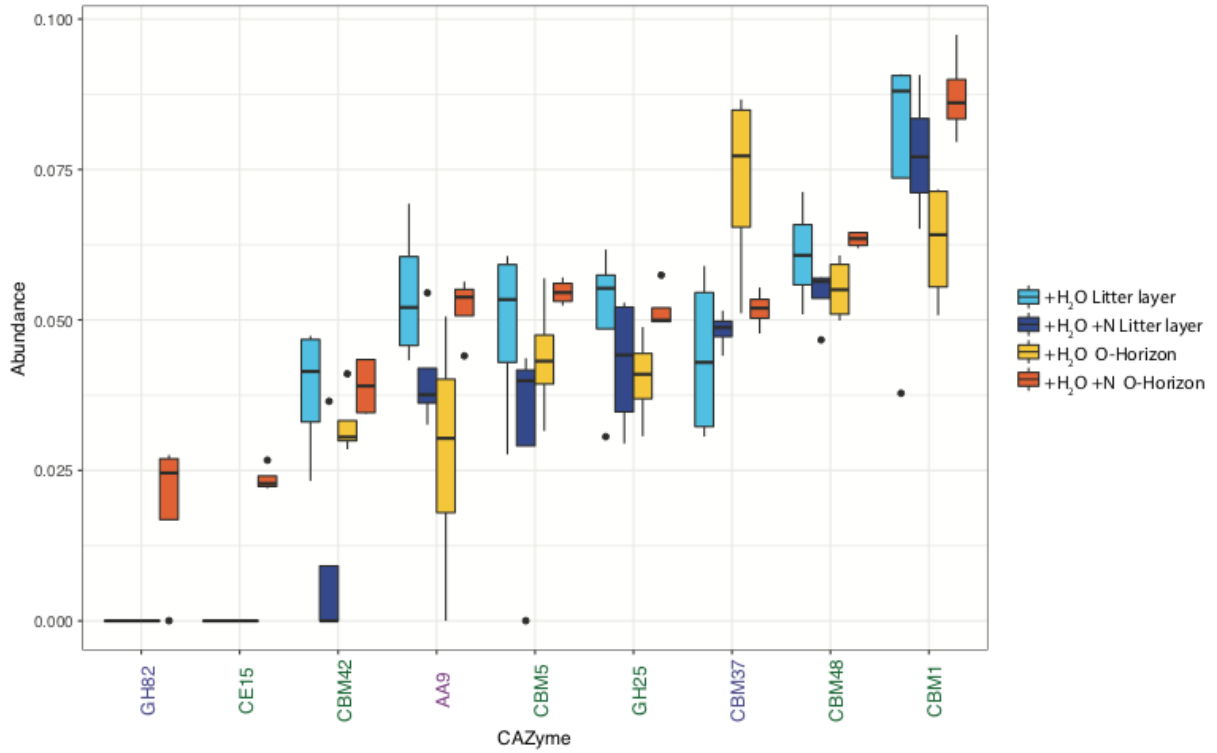

**Figure S4.** CAZymes showing a significant interactive effect between horizon and treatment [ + H<sub>2</sub>O litter layer (light blue), +H<sub>2</sub>O +N litter layer (dark blue), + H<sub>2</sub>O O-horizon (light orange), +H<sub>2</sub>O +N litter layer (dark orange)] at the final sampling time (64 hours). CAZymes associated with bacteria/archaea (blue), fungi (purple) or both bacteria/archaea and fungi (green).

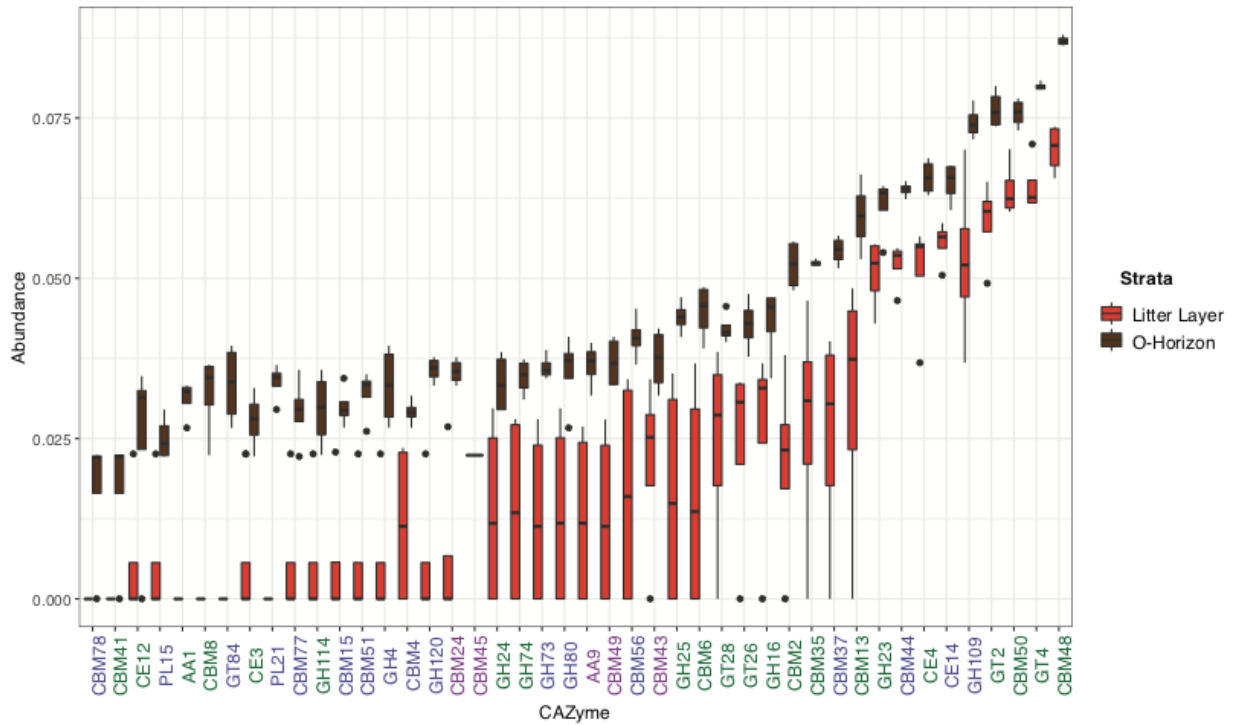

**Figure S5.** CAZymes with significantly different expression at the initial sampling time (0 hours) in the litter layer (red) compared to the O-horizon (brown). CAZymes associated with bacteria/archaea (blue), fungi (purple) or both bacteria/archaea and fungi (green).

A.

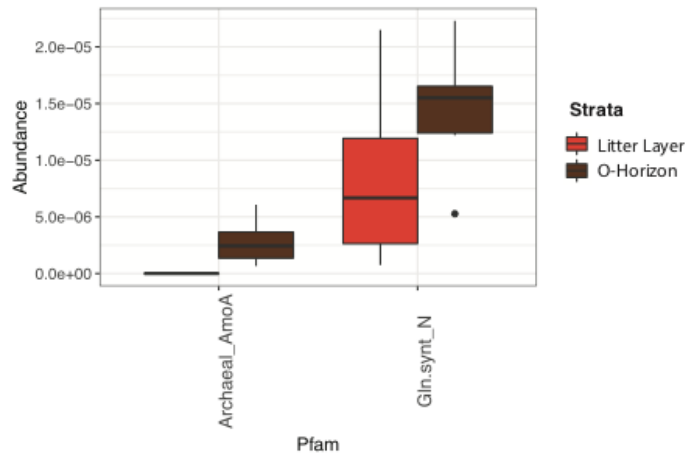

B.

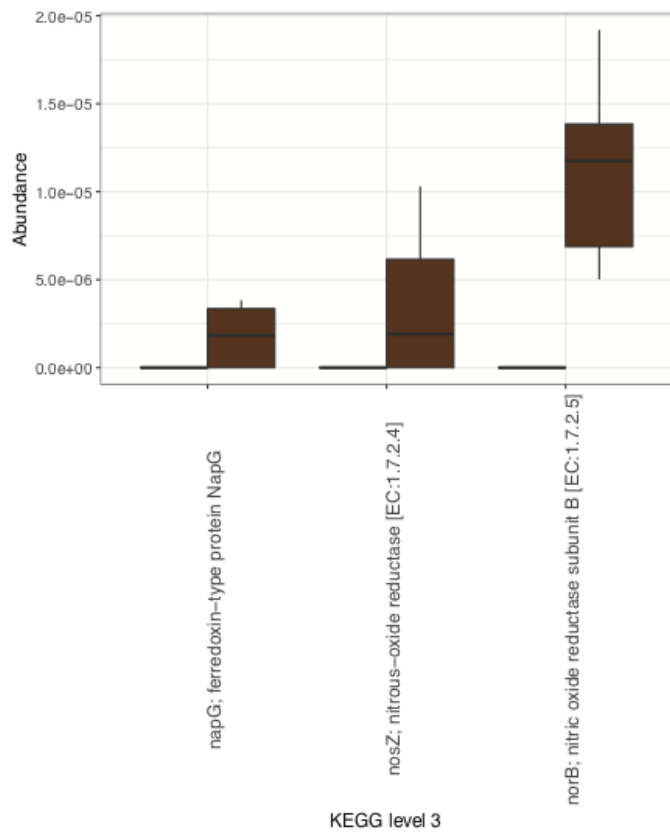

**Figure S6.** Nitrogen cycling genes showing significantly different expression levels in the litter layer compared to the O-horizon as annotated by a) pFam b) KEGG.
